# Supplementary material
Source: Research Square preprint supplement (doi:10.21203/rs.3.rs-9049000/v1)
Supplement: Supplementary file 1 [file be7f887d5bcab321697421e6.docx]

APPENDIX

This supplementary section presents a comprehensive table that combines IDBMF's structured four-phase approach with quantitative validation data, demonstrating the framework's effectiveness in advancing BIM data governance, interoperability, security, and governance maturity. Appendix 1 creates a standardized, adaptable, and scalable data management model for BIM environments by systematically aligning ISO 19650's structured information management workflows with DMBoK2's governance principles. Quantifying the measured improvements validates the IDBMF's capacity to increase documentation accuracy, optimize real-time collaboration, strengthen security controls, and establish scalable governance mechanisms. The structured assessment of these parameters provides a solid foundation for both academic research and industry applications, strengthening the practical applicability of the proposed framework.

Appendix 1. Comprehensive table integrating IDBMF's structured four-phase approach with quantitative validation data.

| Phase | ISO 19650 Integration | DMBoK2 Knowledge Area | Metric Evaluated | Pre-Implementation | Post-Implementation | Improvement (%) | Framework Contribution |
| --- | --- | --- | --- | --- | --- | --- | --- |
| Phase 01: Standardization | EIR & BEP structured documentation; metadata alignment; naming conventions | Metadata Management; Data Architecture; Glossary & Taxonomy | Documentation Accuracy | 60% | 88% | +28% | Ensured structured deliverables, improved metadata consistency, and strengthened traceability across disciplines. |
| Metadata Traceability | 55% | 90% | +35% | Enhanced information retrieval and reduced ambiguity in documentation workflows. |
| Phase 02: Interoperability | Common Data Environment (CDE); exchange protocols; coordination workflows | Data Integration; Data Quality; Lifecycle Management | Coordination Errors | 18% | 4% | –77% | Reduced interdisciplinary conflicts through standardized CDE-based coordination. |
| Model Synchronization Time | 8 hours | 3.5 hours | –56% | Improved real-time collaboration and reduced model update delays. |
| Data Exchange Consistency | 65% | 92% | +27% | Strengthened interoperability through validated and automated exchange mechanisms. |
| Phase 03: Data Quality & Security | ISO 19650 5 access control; compliance checks; security protocols | Data Security; Data Protection; Data Quality Governance | Unauthorized Access Attempts | 35 cases/month | 3 cases/month | –92% | Reinforced security governance through access control, encryption, and monitoring. |
| Data Loss Incidents | 8 incidents/month | 1 incident/month | –88% | Improved long-term data retention and operational resilience. |
| Compliance Accuracy | 68% | 94% | +26% | Increased regulatory adherence via automated validation and audit mechanisms. |
| Phase 04: Governance Maturity | Governance maturity evaluation; lifecycle adaptability; audit cycles | Data Lifecycle Management; Maturity Models; Governance Oversight | Initial Governance Maturity | 45% | 82% | +37% | Established scalable governance processes aligned with ISO 19650 and DMBoK2. |
| Intermediate Maturity Level | 60% | 90% | +30% | Strengthened governance performance across documentation, interoperability, and security. |
| Advanced Maturity Level | 72% | 97% | +25% | Optimized long-term governance adaptability and lifecycle management. |
